# Supplementary material for: Cardiac patients show high interest in technology enabled cardiovascular rehabilitation
Source: PubMed Central journal article supplement (PMC4949752; doi:10.1186/s12911-016-0329-9), 2016-07-19
Supplement: 12911_2016_329_MOESM1_ESM.pdf [file 12911_2016_329_MOESM1_ESM.pdf]

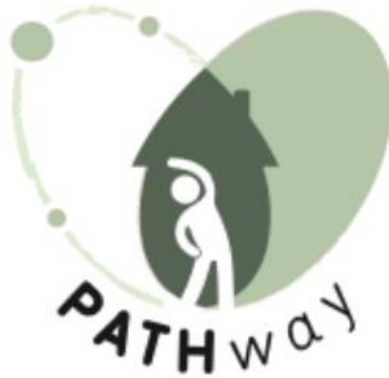

# Technology Usage Questionnaire

**Research Participation Number  
(will be given by researcher)**

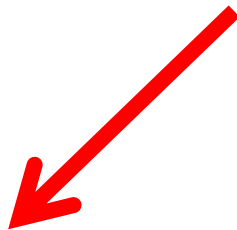

**Your research participation number means that this questionnaire will be anonymous-instead of your name you now have a number just for you.**

**The consent form with your name will be separated from this questionnaire.**

**They will only be matched back together if you wish to withdraw from the study.**

# Technology Usage Questionnaire

Please tick (✓) ONE box only.

**Q1: Are you male or female?**  Male  Female

**Q2: How old are you? write in e.g., 63)** \_\_\_\_\_ years old

**Q3: What is your current employment status:**

- Employed for wages
- Self-employed
- Out of work and looking for work
- Out of work but not currently looking for work
- A homemaker
- A student
- Retired
- Unable to work

**Q4: What is the highest level of education you have completed?**

- Some primary (not complete)
- Primary or equivalent
- Intermediate/junior/group certificate or equivalent
- Leaving certificate or equivalent
- Diploma/certificate
- Primary degree
- Postgraduate/higher degree
- None

**Q5: How often do you attend exercise classes:**

- less than 1 time/week
- 1 time/ week
- 2 times/week
- 3 times/week
- more than 3 times/week

**Q6: Do you smoke?**  Yes.....  No.....

**Q7 Do you drink alcohol regularly (i.e. more than 7 drinks/week)?**

Yes  No

**Q. 8 For which reason(s) do you attend cardiac rehabilitation? (Tick (✓) all that apply)**

- heart attack
- stenting
- bypass grafting
- valve surgery
- pacemaker/ICD
- heart failure

**Q9: Do you have a mobile phone or smartphone?**

Please tick (✓) ONE box only

Yes..... (go to question 10)  No..... (go to question 18)

**Q10. What functions do you use on your mobile phone/ smartphone? (Tick (✓) all that apply)**

- Phone calls
- Text messaging
- Camera
- Receive videos and/or photos
- Internet search (e.g., google)
- Applications ('apps' e.g., skype, google maps, hailo)
- IM (instant messaging, e.g., viber, whatsapp etc.)
- Social networks (e.g., facebook)
- Gaming applications (e.g., angry birds, candycrush)

**Q11: Would you be interested in receiving continuing advice cardiac rehabilitation support via your mobile phone/smartphone?**

Please tick (✓) ONE box only

- Yes (go to question 13)     No (go to question 12)

**Q12: If no, why not? Please explain briefly.**

---

---

**Q13: If yes, which types of mobile phone/smart phone communication would you like? (Tick (✓) all that apply)**

- Text message  
 Video clip  
 Smartphone App  
 Internet  
 Emails  
 Other:  
(please list)

---

**Q14: If there was a free program that offered these types of communication from your Cardiac Rehabilitation medex program would you sign up?**

- Yes..... (go to question 15)  
 No..... (go to question 16)

**Q15: If yes, how many messages would you like to receive?**

- less than 1-2 messages per week  
 1-2 messages per week  
 3-4 messages per week  
 1 message per day  
 2 messages per day

**Q16: Do you have regular access to the Internet?**

Please tick (✓) ONE box only

- Yes (go to question 17).....  No (go to question 19)

**Q17: If yes, how often do you use the internet?**

- everyday  
 3 or more times per week  
 once per week  
 less than once per week

**Q18: What device do you use to access the internet? (Tick(✓) all that apply)**

- Personal computer (e.g. desktop/ laptop)  
 Tablet (e.g. ipad, ipad mini etc.).  
 Phone  
 Other (please specify)\_\_\_\_\_

**Q19: Would you be interested in receiving continuing cardiac rehabilitation support via the internet?**

Please tick (✓) ONE box only

- Yes (go to question 21) .....  No (go to question 20)

**Q20: If no, why not? Please explain briefly:**

---

---

**Q24: If yes, which types of internet communication would you like? (Tick(✓) all that apply)**

- E-mails  
 Educational Video  
 Web sites  
 Information in leaflet form  
 Other:  
(please list)

---

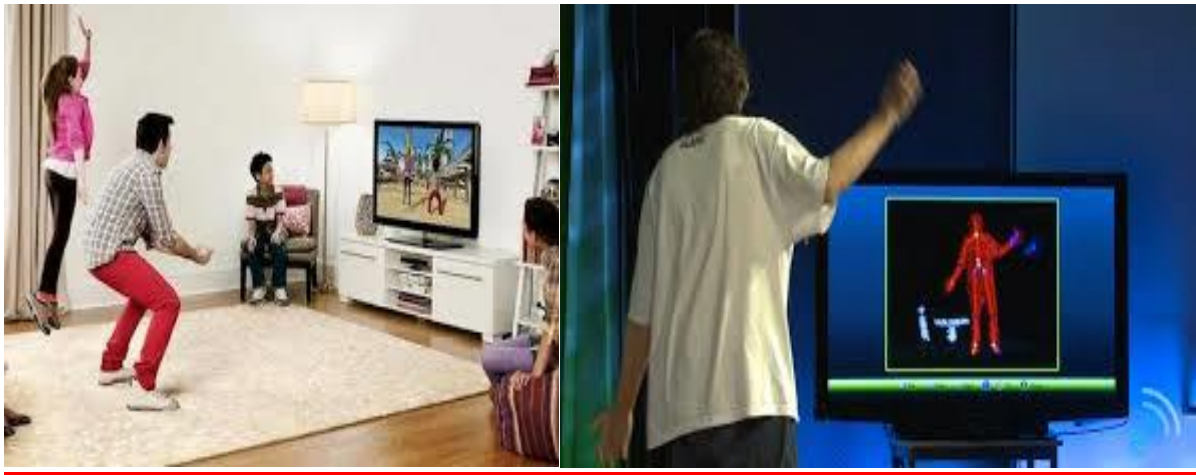

**Q21:** Are you aware of computer based physical activity games (e.g., Nintendo Wii, Microsoft Kinect (Xbox), such as those in the pictures above)? (perhaps your children own an Xbox)?

- Yes, I know what it is
- Have seen it before
- No

**Q22:** Have you used it before?

- Yes, I have used it
- No, I have never used it

**Q23:** How would you rate a home rehabilitation exercise program, similar to a Nintendo Wii/ Kinect Xbox computer game?

- I would like to try it
- Sounds interesting/useful
- Does not sound interesting/useful
- I would not like to try it

**Q24:** How much interaction with such a game platform would you tolerate?

- Only really few mouse clicks to start exercising
- Would not mind more than a few
- Would prefer to have a full menu of interaction, to be in control of the game

**Q25:** Would you think that a virtual rehabilitation class (where you could exercise with other patients and virtual coach) would be useful?

- Sounds appealing
- Will definitely engage
- Prefer to do it on my own
- Sounds unappealing

**Q26: How useful would the following advice be?**

**Please tick (✓) a box between 1-5 for each line)**

|                                                                        | <b>1<br/>Not at all<br/>useful</b> | <b>2</b> | <b>3<br/>Somewhat<br/>useful</b> | <b>4</b> | <b>5<br/>Very useful</b> |
|------------------------------------------------------------------------|------------------------------------|----------|----------------------------------|----------|--------------------------|
| <b>Exercise ideas</b>                                                  |                                    |          |                                  |          |                          |
| <b>Exercise prompts</b>                                                |                                    |          |                                  |          |                          |
| <b>Exercise programme taught by a virtual coach (via the internet)</b> |                                    |          |                                  |          |                          |
| <b>Information on local exercise opportunities</b>                     |                                    |          |                                  |          |                          |
| <b>Healthy meal ideas and recipes</b>                                  |                                    |          |                                  |          |                          |
| <b>Practical ideas to manage stress</b>                                |                                    |          |                                  |          |                          |
| <b>Setting goals</b>                                                   |                                    |          |                                  |          |                          |
| <b>Steps to achieve goals</b>                                          |                                    |          |                                  |          |                          |
| <b>How to overcome cigarette cravings</b>                              |                                    |          |                                  |          |                          |
| <b>How to remember to take your medications</b>                        |                                    |          |                                  |          |                          |
| <b>Healthy eating tips for takeaways and dining out</b>                |                                    |          |                                  |          |                          |
| <b>How to link up with others who are living with heart disease</b>    |                                    |          |                                  |          |                          |

**Q27: If there is any advice that you would find useful that is not mentioned above please list:**

---

---

**Q28: Do you currently use a heart rate monitor while exercising?**

Yes .....  No (go to question 30)

**Q29: If no, would you like your heart rate to be monitored by a wrist watch device when you exercise at home?**

Yes .....  No

**Q 30: Do you currently wear any other type of device which records your physical activity levels (e.g. fitbit, pedometer)**

Yes .....  No

**Should you have any other comments, please provide them here:**

---

---

---

---

Thank you very much for taking part.
